# Supplementary material for: Measurement report: Atmospheric fluorescent bioaerosol concentrations measured during 18 months in a coniferous forest in the south of Sweden
Source: Copernicus journal article supplement (doi:10.5194/acp-23-4977-2023), 2023-05-03
Supplement: Supplementary file 1 [file acp-23-4977-2023-supplement.pdf]

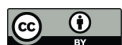

*Supplement of*

## **Measurement report: Atmospheric fluorescent bioaerosol concentrations measured during 18 months in a coniferous forest in the south of Sweden**

**Madeleine Petersson Sjögren et al.**

*Correspondence to:* Jakob Löndahl ([jakob.londahl@design.lth.se](mailto:jakob.londahl@design.lth.se))

The copyright of individual parts of the supplement might differ from the article licence.

Corresponding author: Jakob.Londahl@design.lth.se

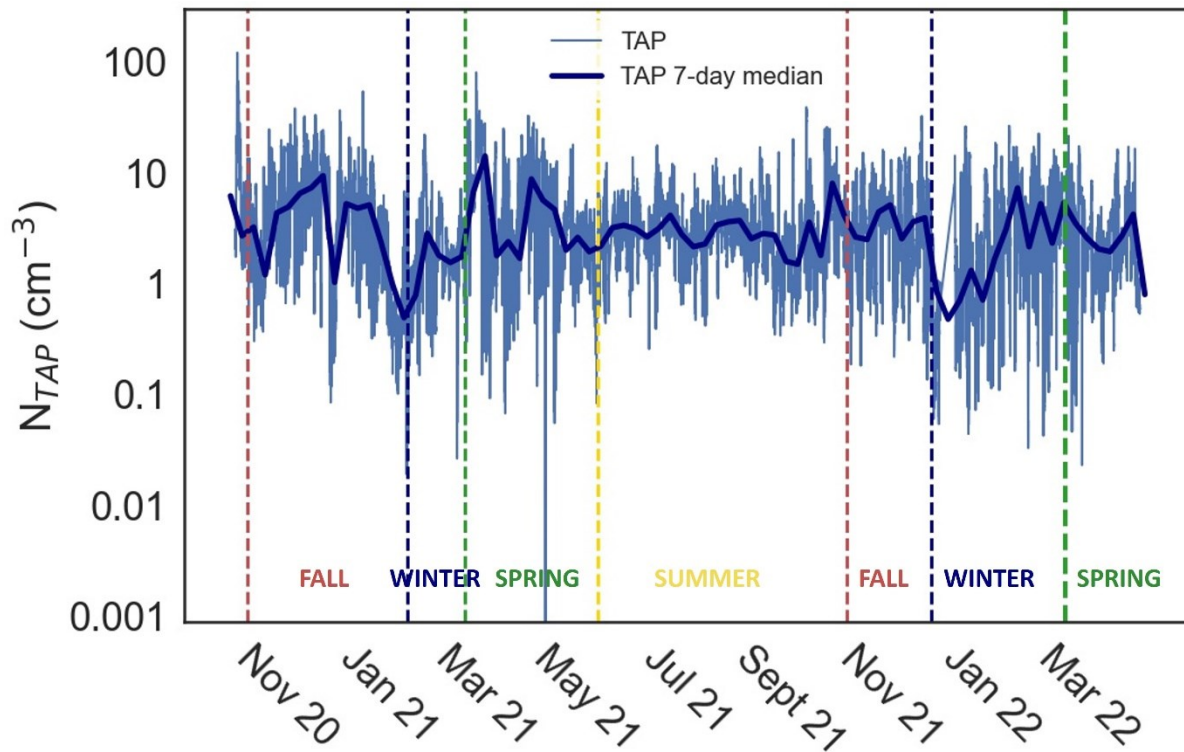

Figure S1: Overview of  $N_{TAP}$  concentration between 6 October 2020 and 1 April 2022. Small dots represent individual 5 min data averages. The curve cutting through the  $N_{TAP}$  data shows running 7-day median values of the  $N_{FBAP}$  concentration. Vertical dashed lines indicate the first day of each season as identified by the Swedish meteorological and hydrological institute.

Supplementary information for *Atmospheric fluorescent bioaerosol concentrations measured during 18 months in a coniferous forest in the south of Sweden.*

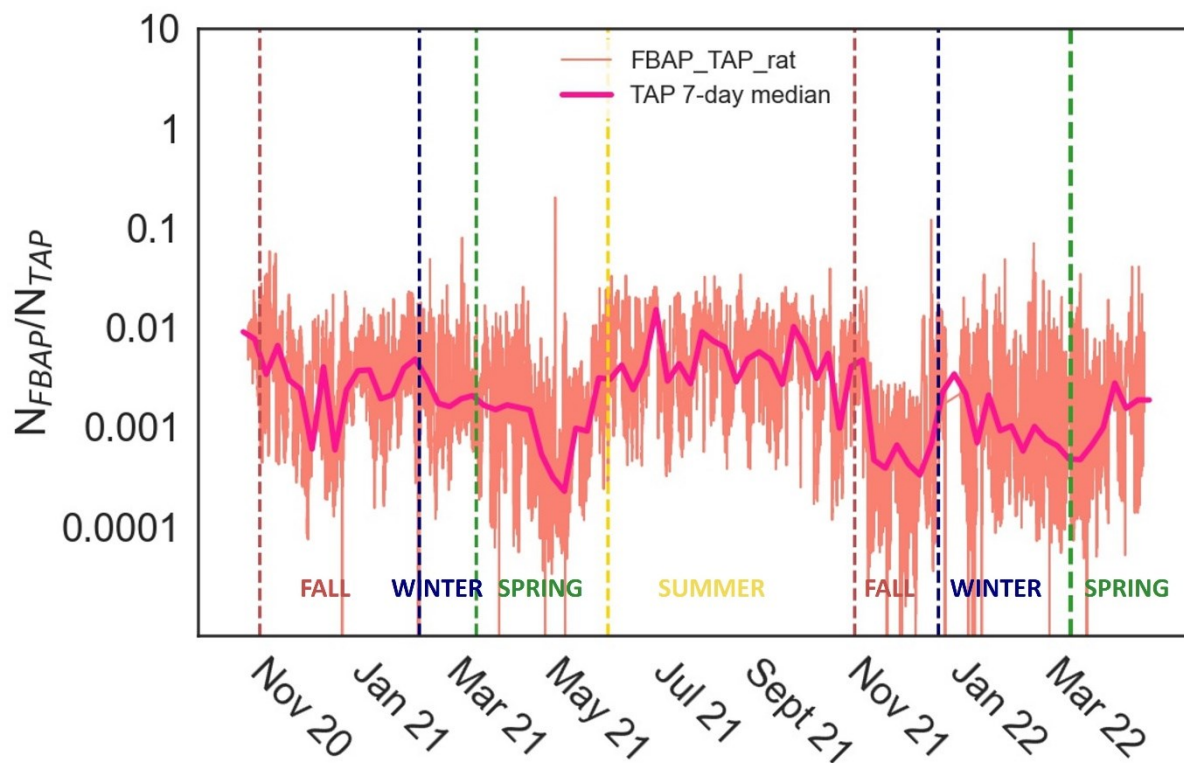

Figure S2: Overview of  $N_{FBAP}/N_{TAP}$  between 6 October 2020 and 1 April 2022. The thin red line represents individual 5 min data averages and the curve cutting through the  $N_{FBAP}/N_{TAP}$  data shows running 7-day median values of the  $N_{FBAP}/N_{TAP}$ . Vertical dashed lines indicate the first day of each season as identified by the Swedish meteorological and hydrological institute. Overall, these data follow the general pattern of the  $N_{FBAP}$  with a steep increase at the intersection of spring and summer and steep decrease in the beginning of fall in 2021.

Supplementary information for *Atmospheric fluorescent bioaerosol concentrations measured during 18 months in a coniferous forest in the south of Sweden.*

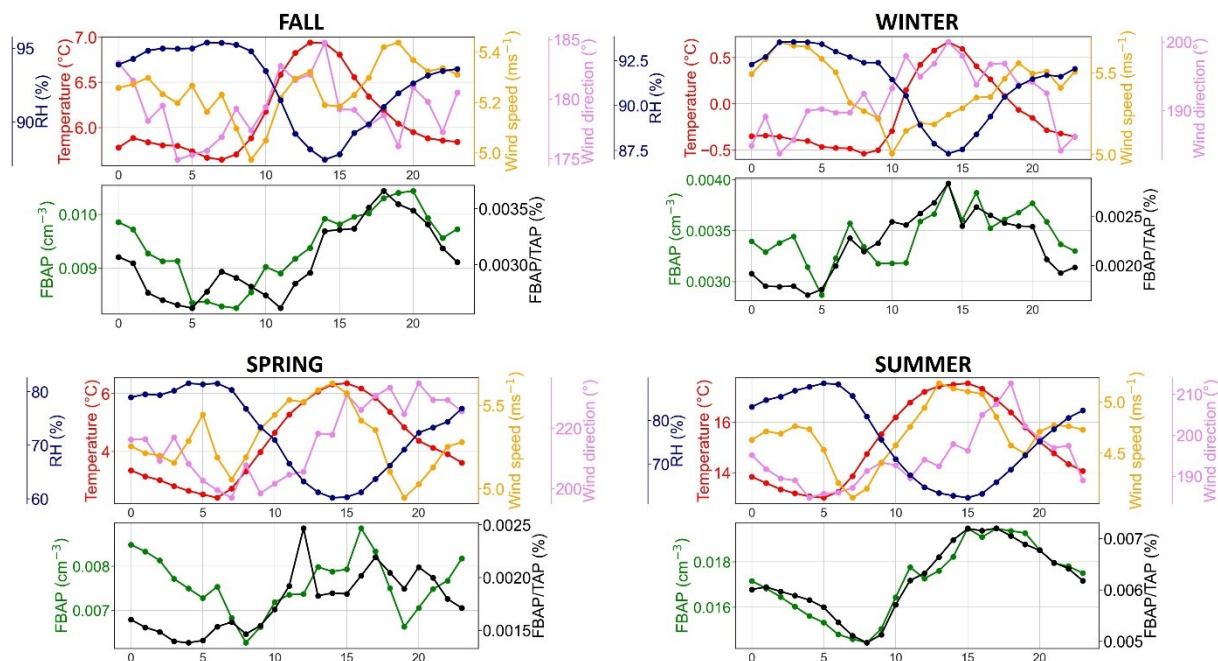

**Figure S3: Diel cycles of meteorological parameters (top panels) and FBAP number concentrations with FBAP/TAP (lower panels) for each season of the measurement period (hourly median values as a function of local time of the day). In the top panel, left axis show air temperature and RH variations in and blue, while scales for wind speed and wind direction are indicated in yellow and pink. On the lower panels, the left axis shows integrated coarse FBAP concentration (green), while the right axis shows FBAP fraction of TAP number (black).**

Figure S3 suggests that there are daily cycles for  $N_{\text{FBAP}}$  and  $N_{\text{FBAP}} / N_{\text{TAP}}$ , but the hourly and daily variations were numerically very small. This can be seen by investigating the leftmost y-axes in the lower panels in Figure S3. The seasonally averaged diurnal plots shown in Figure S3 indicate that for all seasons the minimum  $N_{\text{FBAP}}$ , and  $N_{\text{FBAP}}/N_{\text{TAP}}$ , occurred in the morning between 05:00 and 10:00. These cycles are somewhat in contrast with similar studies [1-5], which reported  $N_{\text{FBAP}}$  and  $N_{\text{FBAP}}/N_{\text{TAP}}$  to peak late in the evening, night-time, or early morning, when RH is minimum. In this study, only the fall season agrees well with the daily cycle previously observed.

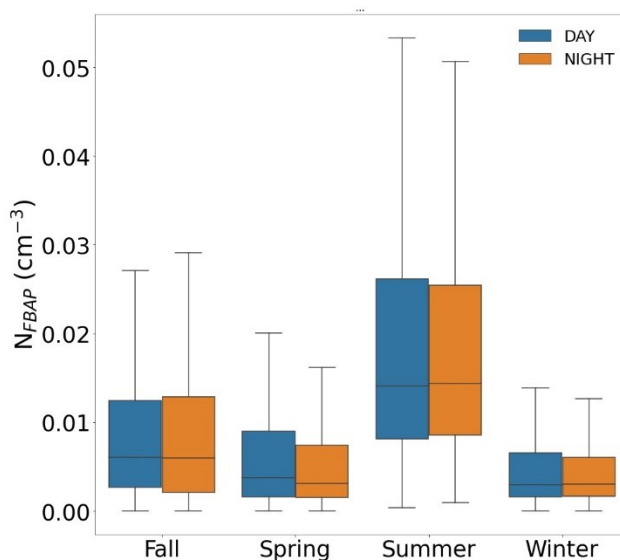

**Figure S4: Statistical distributions of  $N_{\text{FBAP}}$  abundance during daytime and nighttime over the full campaign, divided into each season. No difference was observed between  $N_{\text{FBAP}}$  during day as compared to night.**

Figure S5 shows exemplary rain events in the fall (a) and in the summer (b). The left y-axis (red) shows the measured cumulative precipitation for each hour, while the right y-axis (black) shows  $N_{\text{FBAP}}$ . Each hour belonging to a rain event is marked with green, blue, and magenta depending on whether it counts as before, during or after rain. For each rain event visible in Figure 5, increases in  $N_{\text{FBAP}}$  occurred. However, the figure also shows that similar increases occurred when there was no rain. It is also notable that the increases in  $N_{\text{FBAP}}$  seem to have been related to the intensity of the rain, where a higher rain peak appears to have induced a higher  $N_{\text{FBAP}}$  peak. Figure S6 displays the distribution of  $N_{\text{FBAP}}$  before, during, after rain and when there was no rain for each season. None of the distributions were statistically significantly different from each other.

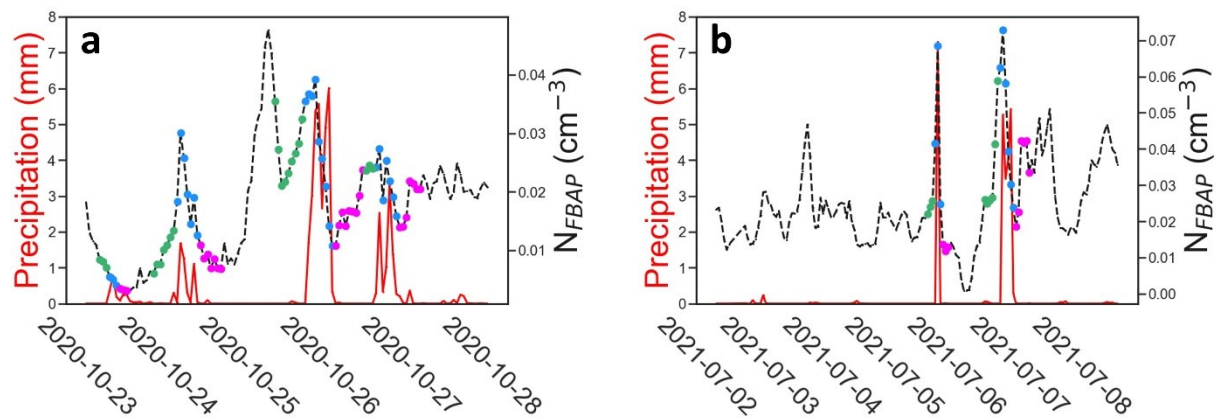

**Figure S5:** Two exemplary periods of time with rain events: 23-28 October 2020 (a) and 2-8 of July 2021. The cumulative hourly precipitation (red) is shown in red and the  $N_{\text{FBAP}}$  concentration is shown as the black dotted curve. Each consecutive hour with precipitation  $>0.5$  mm was defined as a rain event.  $N_{\text{FBAP}}$  concentrations before (green), during (blue) and after (magenta) each rain event are indicated. Both periods in time indicate that in association with those rain events, an increase in  $N_{\text{FBAP}}$  was recorded. In addition to this, figure S5a seems so indicate that the increase in  $N_{\text{FBAP}}$  scaled with the intensity of the rain event.

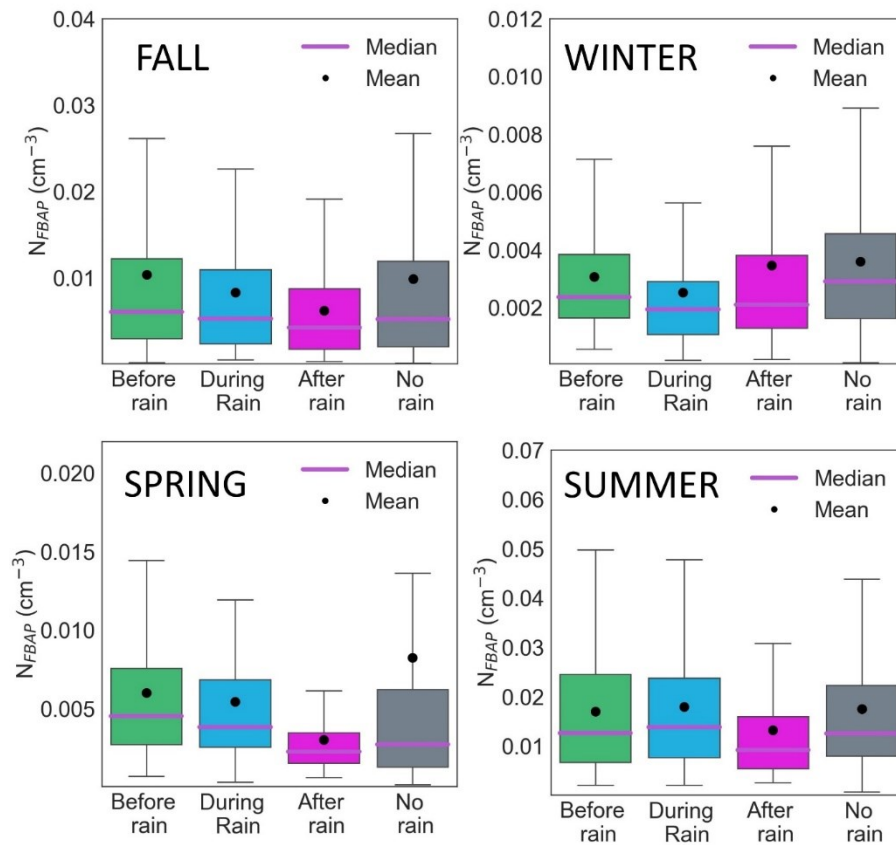

**Figure S6: Integrated NFBAP concentrations for each season before, during, after and when no rain was measured. Although individual rain events were observed to cause strong increases in NFBAP, no significant effects were seen when integrating over the whole seasons.**

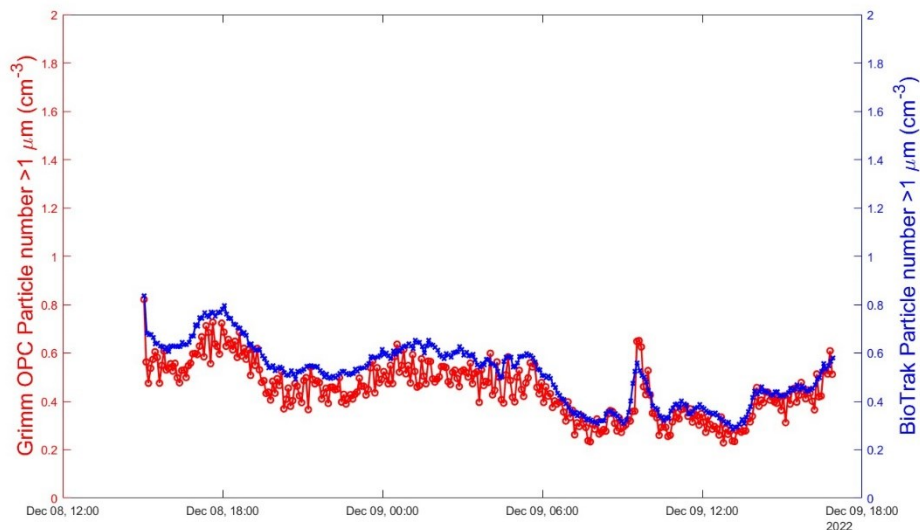

**Figure S7: Validation of the BioTrak OPC with a Grimm OPC during 25 hours in December 2022. The total Grimm OPC aerosol particle number concentration (red) was measured for aerosol particles with diameters 0.8-12  $\mu\text{m}$ , while the BioTrak aerosol particle counter measured particles with diameters 1-12  $\mu\text{m}$  in diameter.**

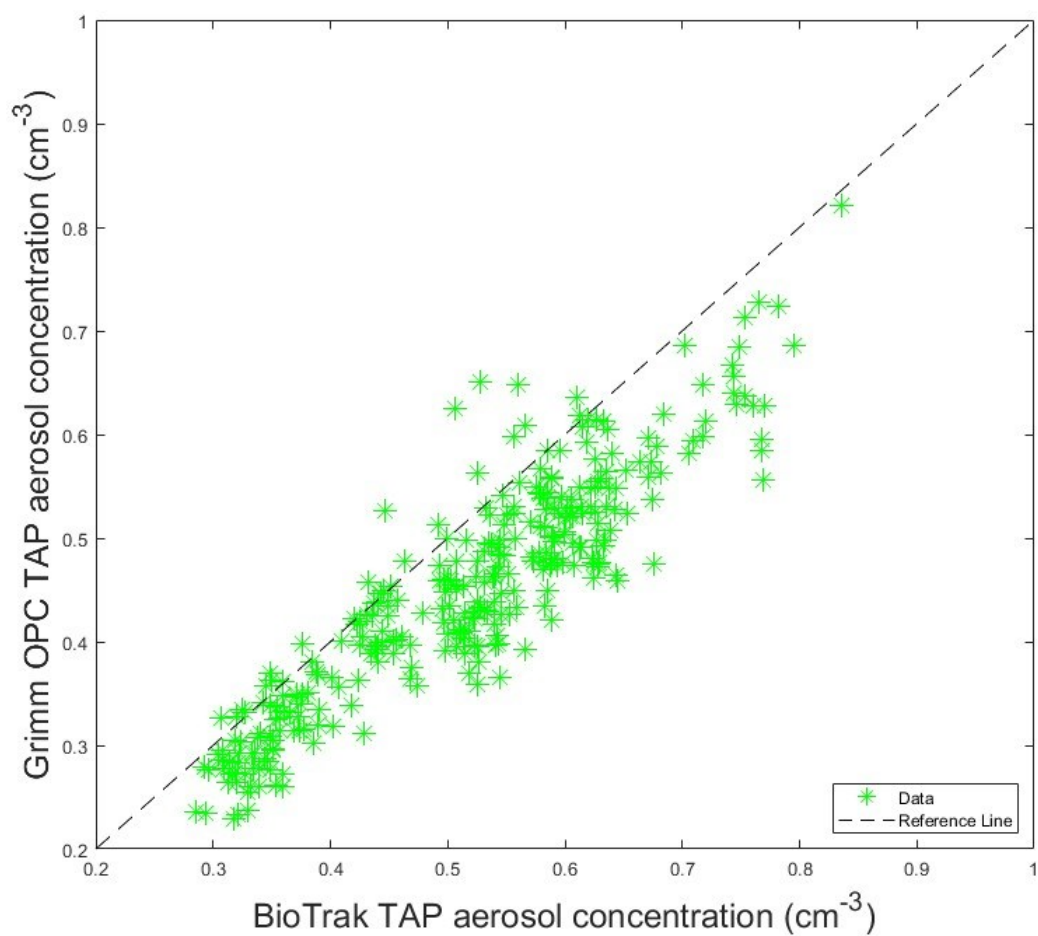

**Figure S8:** OPC total aerosol particle concentration as a function of Tap measured with the BioTrak (for particles with diameters 0.8 to 12  $\mu\text{m}$  and 1-12  $\mu\text{m}$ , for the Grimm OPC and the BioTrak, respectively).

Table S1: Extended version of table 1, also including shorter ( $\leq 4$  weeks) LIF-FBAP measurements. Continuous measurements of FBAP with real-time detection, with identified associations and correlations with meteorological parameters and cycles in  $N_{\text{FBAP}}$ . When no average  $N_{\text{FBAP}}$  or  $N_{\text{FBAP}}/N_{\text{TAP}}$  was reported this is indicated by a hyphen. When both mean and median values were reported, they are here listed as mean/median.

| Location                           | Land use                 | Instrument       | Measurement period             | Season(s)                                      | Average $N_{\text{FBAP}}$ ( $\text{cm}^{-3}$ ) (Mean/Median)                         | $N_{\text{FBAP}}$ % of supermicron particles     | Associations between FBAP and meteorology observed                                                                                      | $N_{\text{FBAP}}$ -cycles                          |
|------------------------------------|--------------------------|------------------|--------------------------------|------------------------------------------------|--------------------------------------------------------------------------------------|--------------------------------------------------|-----------------------------------------------------------------------------------------------------------------------------------------|----------------------------------------------------|
| Mainz, Germany <sup>1</sup>        | Semi-urban               | UV-APS           | 4 months: Aug-Dec, 2006        | Fall<br>Winter                                 | 0.03                                                                                 | ~4                                               | FBAP increase with RH.<br>No correlation with WD.                                                                                       | 24-h cycle with max early/mid-morning              |
| Amazon, Brasil <sup>2</sup>        | Tropical rainforest      | UV-APS           | 5 weeks: Feb-Mar, 2008         | Rain season                                    | 0.073                                                                                | 24                                               | FBAP increased with RH.<br>FBAP decreased with AT<br>Heavy rain was associated with FBAP increases.                                     | 24-h cycle with max in the night                   |
| Colorado, USA <sup>3</sup>         | Semi-arid, rural forest  | UV-APS<br>WIBS-4 | 5 weeks: Jul-Aug, 2011         | Summer                                         | -                                                                                    | -                                                | FBAP increased during rain                                                                                                              | -                                                  |
| Hyytiälä, Finland <sup>4</sup>     | Rural forest             | UV-APS           | 20 months: Aug 2009-April 2011 | Spring<br>Summer<br>Fall<br>Winter             | 0.015<br>0.046<br>0.027<br>0.004                                                     | 4.4<br>13<br>9.8<br>1.1                          | FBAP scaled with RH in summer in both locations.<br>In Finland, at RH>82% FBAP decreased.                                               | 24-h cycle with max evening/night for all seasons. |
| Colorado, USA <sup>4</sup>         | Semi-arid, rural forest. |                  | 11 months: Jul 2011-May 2012   | Spring<br>Summer<br>Fall<br>Winter             | 0.015<br>0.030<br>0.017<br>0.0053                                                    | 2.5<br>8.8<br>5.7<br>3.0                         | FBAP increased upon rain events.<br><br>FBAP increases with temp over seasons.<br><br>No pattern seen for wind speed or wind direction. |                                                    |
| South-Western Germany <sup>5</sup> | Semi-rural               | WIBS-4           | 1 year: April 2010-April 2011  | Spring<br><br>Summer<br><br>Fall<br><br>Winter | 0.029/<br>0.024<br><br>0.046/<br>0.040<br><br>0.029/<br>0.023<br><br>0.019/<br>0.017 | 7/5<br><br>10/9<br><br>7/6<br><br>3/4<br><br>7/5 |                                                                                                                                         | 24-h cycle with max late evening/early morning.    |



Supplementary information for *Atmospheric fluorescent bioaerosol concentrations measured during 18 months in a coniferous forest in the south of Sweden.*

|                                                |                          |                  |                          |                     | Full year:<br>0.031/<br>0.025 |                     |                                                                                                                 |                                                 |  |
|------------------------------------------------|--------------------------|------------------|--------------------------|---------------------|-------------------------------|---------------------|-----------------------------------------------------------------------------------------------------------------|-------------------------------------------------|--|
| Helsinki, Finland <sup>6</sup>                 | Suburban and urban       | BioScout UV-APS  | 3 weeks: Feb, 2012       | Winter              | 0.010                         | 5                   | -                                                                                                               | 24-h cycle with max in the night during summer. |  |
|                                                |                          |                  | 9 weeks: Jun-Aug, 2012   | Summer              | 0.028                         | 23                  |                                                                                                                 |                                                 |  |
| Colorado, USA <sup>7</sup>                     | Semi-arid rural forest.  | UV-APS WIBS-3    | 5 weeks: Jul-Aug, 2014   | Summer              | -                             | -                   | -                                                                                                               | -                                               |  |
| Munnar, India <sup>8</sup>                     | Tropical, high altitude. | UV-APS           | 11 weeks: June-Aug, 2014 | Monsoon and winter* | 0.02                          | 2                   | FBAP strongly dependent on WD.<br>FBAP increased with RH.<br>FBAP decreased with AT.<br>FBAP decreased with WS. | 24-h cycle with max at high RH and low AT.      |  |
| Manchester, UK <sup>9</sup>                    | Urban city center        | WIBS-3           | 2 weeks: Dec, 2009       | Winter              | -                             | -                   | -                                                                                                               | -                                               |  |
| Borneo, Malaysia <sup>9</sup>                  | Remote, tropical         |                  | 3 weeks: June-July 2008  | Summer              | -                             | -                   | -                                                                                                               | -                                               |  |
| Puy de Dôme, France <sup>10</sup>              | Remote                   | WIBS-3           | 2 weeks: Jun-Jul, 2010   | Summer              | 0.27                          | -                   | -                                                                                                               | 24-h cycle with max mid-day.                    |  |
| Colorado, USA <sup>11</sup>                    | Semi-arid, rural forest  | WIBS-3<br>WIBS-4 | 2 weeks: Jun-Jul, 2011   | Summer              | 0.050-0.30                    | -                   | FBAP increased with RH.                                                                                         | 24-h cycle with min at mid-day.                 |  |
| Killarney National Park, Ireland <sup>12</sup> | Rural                    | WIBS-4, UV-APS   | 4 weeks: Aug-Sep, 2010   | Summer              | -                             | -                   | FBAP increased with RH.                                                                                         | 24-h cycle with max at night.                   |  |
| Nanjing, China <sup>13</sup>                   | Suburban                 | WIBS-4           | 2 weeks: Oct-Nov, 2013   | Fall                | 0.57, 3.35,<br>2.09           | 4.6<br>25.3<br>15.6 | -                                                                                                               | -                                               |  |

<sup>1,2,3</sup> Huffman et al. (2010, 2012, 2013); <sup>4</sup> Scumacher et al (2013); <sup>5</sup> Toprak and Schnaiter (2013); <sup>6</sup> Saari et al. (2015); <sup>7</sup> Gosselin et al. (2016); <sup>8</sup> Valsan et al. (2016), <sup>9,10</sup> Gabey et al. (2011, 2013); <sup>11</sup> Crawford et al. (2014); <sup>12</sup> Healy et al. (2014); <sup>13</sup> Yu et al. (2016).

\*Results were only reported for Monsoon period and not for the winter

Abbreviations: Relative humidity RH; Air temperature AT; Wind direction WD; Wind speed WS.

## References

- [1] J. A. Huffman, B. Treutlein, and U. Pöschl, "Fluorescent biological aerosol particle concentrations and size distributions measured with an Ultraviolet Aerodynamic Particle Sizer (UV-APS) in Central Europe," *Atmos. Chem. Phys.*, vol. 10, no. 7, pp. 3215-3233, 2010, doi: 10.5194/acp-10-3215-2010.
- [2] J. A. Huffman, B. Sinha, R. M. Garland, A. Snee-Pollmann, S. S. Gunthe, P. Artaxo, S. T. Martin, M. O. Andreae, and U. Pöschl, "Size distributions and temporal variations of biological aerosol particles in the Amazon rainforest characterized by microscopy and real-time UV-APS fluorescence techniques during AMAZE-08," *Atmos. Chem. Phys.*, vol. 12, no. 24, pp. 11997-12019, 2012, doi: 10.5194/acp-12-11997-2012.
- [3] C. J. Schumacher, C. Pöhlker, P. Aalto, V. Hiltunen, T. Petäjä, M. Kulmala, U. Pöschl, and J. A. Huffman, "Seasonal cycles of fluorescent biological aerosol particles in boreal and semi-arid forests of Finland and Colorado," *Atmos. Chem. Phys.*, vol. 13, no. 23, pp. 11987-12001, 2013, doi: 10.5194/acp-13-11987-2013.
- [4] E. Toprak and M. Schnaiter, "Fluorescent biological aerosol particles measured with the Waveband Integrated Bioaerosol Sensor WIBS-4: laboratory tests combined with a one year field study," *Atmos. Chem. Phys.*, vol. 13, no. 1, pp. 225-243, 2013, doi: 10.5194/acp-13-225-2013.
- [5] S. Saari, J. Niemi, T. Rönkkö, H. Kuuluvainen, A. Järvinen, L. Pirjola, M. Aurela, R. Hillamo, and J. Keskinen, "Seasonal and Diurnal Variations of Fluorescent Bioaerosol Concentration and Size Distribution in the Urban Environment," *Aerosol and Air Quality Research*, vol. 15, no. 2, pp. 572-581, 2015, doi: 10.4209/aaqr.2014.10.0258.
